# Supplementary material
Source: publisher site journal article supplement (https://www.dovepress.com/article/593138)
Supplement: Supplementary file 1 [file Supplementary%20Table%201.docx]

**Supplementary Table 1. RT-qPCR assay information**

TaqMan Gene Expression Assays were used in this study. Primer and probe sequences are proprietary to the manufacturer; therefore, assay IDs are provided for reproducibility.

| **Gene** | **TaqMan Assay ID** | **Annealing Temperature (°C)** | **Amplification Efficiency (%)** |
| --- | --- | --- | --- |
| IL-6 | Hs00174131_m1 | 60 | 98 |
| STAT3 | Hs00374280_m1 | 60 | 95 |
| GAPDH | Hs02786624_g1 | 60 | 100 |
